# Supplementary material for: An immune subtype-related prognostic signature of hepatocellular carcinoma based on single-cell sequencing analysis
Source: publisher site journal article supplement (doi:10.18632/aging.204012), 2022-04-12
Supplement: Supplementary file [file aging-v14i7-204012-supplementary-material-SD1.pdf]

## SUPPLEMENTARY TABLE

**Supplementary Table 1. Primer sequences.**

---

|                   |                                  |
|-------------------|----------------------------------|
| Mus Mucus GAPDH_F | AGGTCGGTGTGAACGGATTTG            |
| Mus Mucus GAPDH_R | TGTAGACCATGTAGTTGAGGTCA          |
| ADH4-F            | AGTTCGCATTCAGATCATTGCT           |
| ADH4-R            | CTGGCCCAATACTTTCCACAA            |
| ANP32B-F          | CTGTTCGAGAACTTGTCTTGGAC          |
| ANP32B-R          | AGCTTGGGGAGATTTGAAACTG           |
| FTCD-F            | GGAATGCGTCCCCAACTTTTC            |
| FTCD-R            | TGTCGATAAGTCGGGAAGCTAC           |
| PON1-F            | TCCGAGAGGTACAACCCGTAG            |
| PON1-R            | CCAGTCCATTAGGCAGTATCTCC          |
| SPP1-F            | CTCCATTGACTCGAACGACTC            |
| SPP1-R            | CAGGTCTGCGAACTTCTTAGAT           |
| SQSTM1-F          | GACTACGACTTGTGTAGCGTC            |
| SQSTM1-R          | AGTGTCCGTGTTTCACCTTCC            |
| YBX1-F            | GGGGACAAGAAGGTCATCGC             |
| YBX1-R            | CGAAGGTA C T C C T G G G G T T A |

---
